# Supplementary material
Source: PubMed Central journal article supplement (PMC2859561)

**SUPPLEMENTAL MATERIAL***for***AMSH INTERACTS WITH ESCRT-0 TO REGULATE THE STABILITY AND  
TRAFFICKING OF CXCR4****Maria I. Sierra, Michelle H. Wright and Piers Nash**From Ben May Department for Cancer Research,  
The University of Chicago, Chicago, Illinois 60637

Running head: AMSH controls CXCR4 stability

Address correspondence to: Piers Nash, PhD, 929 East 57th St. W432, Chicago, IL, 60637.

Email: [pdnash@uchicago.edu](mailto:pdnash@uchicago.edu)**SUPPLEMENTAL METHODS**

*High-density peptide arrays.* High-density peptide arrays were synthesized by semi-automated SPOT synthesis on an Intavis MultiSPOT as previously described [56, 64]. The SPOTs membrane was first blocked with 5% milk in TBS-T (0.1M TrisHCl (pH 7.4), 150mM NaCl and 0.1% Tween 20) overnight at 4°C. GST fusion proteins were incubated with the SPOTs membrane containing 1mM DTT for 1.5 hours at room temperature and then washed with TBS-T. GST fusion proteins were detected by immunoblot using an anti-GST antibody (Upstate).

*Ubiquitination Assays.* For Grb2 ubiquitination HeLa cells were seeded onto 100-mm dishes and allowed to adhere overnight. Cells were co-transfected with HA-tagged ubiquitin and either vector, AMSH or AMSH mutants using Lipofectamine 2000. 24 hours post-transfection, cells were washed with ice-cold PBS and lysed on ice in 900µl of immunoprecipitation buffer (as above). Equal amounts of lysate were incubated with 3µg mouse anti-Grb2 (Cell Signaling Technology, Inc.) overnight at 4°C. Protein G beads (Roche) were added to lysates and further incubated for 3 hours at 4°C. Washed beads were eluted in SDS Sample Buffer, subjected to 10% SDS-PAGE, transferred onto nitrocellulose membrane and immunoblotted with mouse anti-HA antibody (Covance) to detect ubiquitinated protein. For Hrs ubiquitination, HeLa cells were transiently co-transfected with HA-ubiquitin and control siRNA or siRNA directed against AMSH using Lipofectamine 2000. Hrs was immunoprecipitated and analyzed for ubiquitination as described above.

## SUPPLEMENTAL FIGURE LEGENDS

**Figure S1. An RXXX motif of AMSH is essential for binding of STAM1 SH3 domain recognition.**

*A*, The residues within the extended RXXX motif of AMSH required for the interaction with the SH3 domain of STAM1 were determined using a SPOTs peptide array. Each amino acid of the AMSH binding motif (vertical axis) was substituted with each natural amino acid (horizontal axis). Membrane was probed with GST-STAM1-SH3 fusion protein was detected by immunoblot with anti-GST antibody. *B*, An intact RXXX motif is required for AMSH binding to a subset of SH3 domains. HeLa cells expressing vector or myc tagged wild type AMSH or RXXX mutants were precipitated with GST-SH3 domains from STAM1, STAM2, Grb2 and Gads. Samples were separated by 10% SDS-PAGE and immunoblotted for myc.

**Figure S2. Expression of catalytically inactive AMSH does not enhance Grb2 ubiquitination under steady-state conditions.**

AMSH does not affect ubiquitination or stability of Grb2. HeLa cells co-transfected with HA-ubiquitin and vector, wild type AMSH, D348A or AXXA-D348A were immunoprecipitated against endogenous Grb2 by anti-Grb2. *A*, ubiquitination status was assessed by immunoblot against HA. *B*, Whole cell lysates were analyzed for Grb2 protein abundance by immunoblot.

**Figure S3. AMSH depletion results in the hyperubiquitination of ESCRT-0.**

HeLa cells transiently co-transfected with HA-ubiquitin and control siRNA (*siControl*) or siRNA directed against human AMSH (*siAMSH*) were immunoprecipitated against endogenous Hrs. *A*, Ubiquitination status of the ESCRT-0 complex was assessed by immunoblotting against HA. Hrs and STAM1 IP controls are shown. *B*, Corresponding whole cell lysates were analyzed for endogenous protein abundance by immunoblot against Hrs, STAM1, AMSH and HA.

Figure S1

**A**

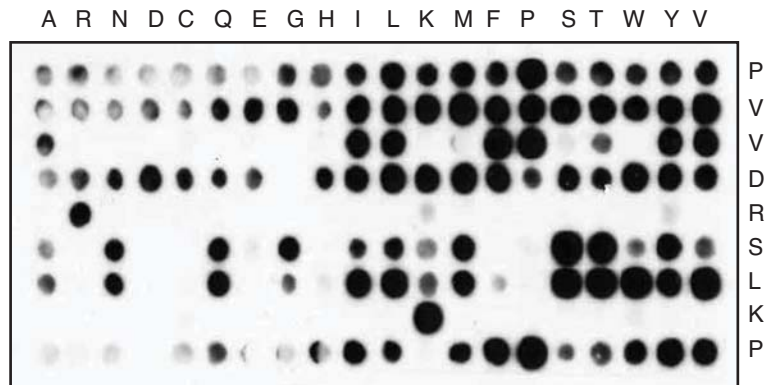

**B**

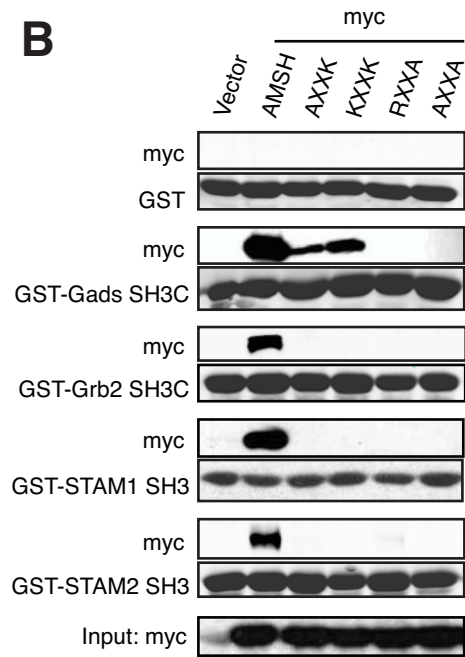



Figure S3

**A**

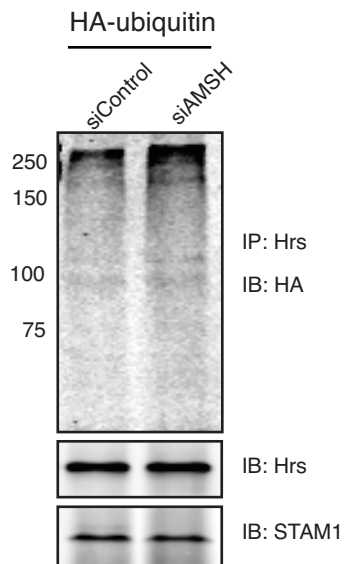

**B**

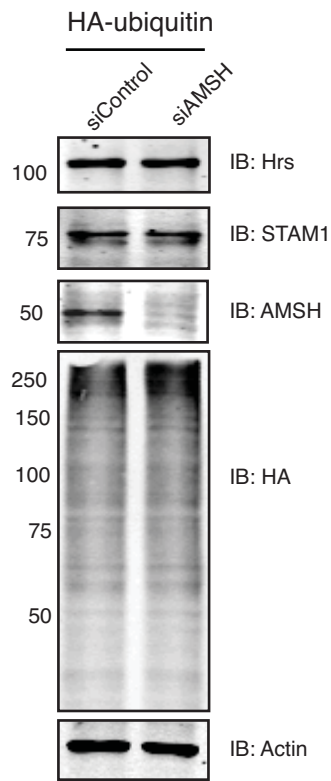

Supplement: supp_M109.061309_jbc.M109.061309-1.pdf [file supp_M109.061309_jbc.M109.061309-1.pdf]
